RESEARCH ARTICLE

# Probing the canonicity of the Wnt/Wingless signaling pathway

Alexandra Franz<sup>1</sup>✉, Daria Shlyueva<sup>2</sup>✉, Erich Brunner<sup>1</sup>, Alexander Stark<sup>2</sup>, Konrad Basler<sup>1\*</sup>

**1** Institute of Molecular Life Sciences, University of Zurich, Zurich, Switzerland, **2** Research Institute of Molecular Pathology (IMP), Vienna Biocenter (VBC), Campus-Vienna-Biocenter 1, Vienna, Austria

✉ These authors contributed equally to this work.

✉ Current address: Biotech Research and Innovation Center, Faculty of Health and Medical Sciences, University of Copenhagen, Copenhagen, Denmark

\* [konrad.basler@imls.uzh.ch](mailto:konrad.basler@imls.uzh.ch)

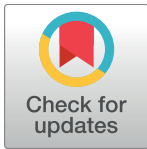

**OPEN ACCESS**

**Citation:** Franz A, Shlyueva D, Brunner E, Stark A, Basler K (2017) Probing the canonicity of the Wnt/Wingless signaling pathway. *PLoS Genet* 13(4): e1006700. <https://doi.org/10.1371/journal.pgen.1006700>

**Editor:** Roel Nusse, Stanford University School of Medicine, Howard Hughes Medical Institute, UNITED STATES

**Received:** January 19, 2017

**Accepted:** March 15, 2017

**Published:** April 3, 2017

**Copyright:** © 2017 Franz et al. This is an open access article distributed under the terms of the [Creative Commons Attribution License](https://creativecommons.org/licenses/by/4.0/), which permits unrestricted use, distribution, and reproduction in any medium, provided the original author and source are credited.

**Data Availability Statement:** All RNA-seq files are available from the SRA NCBI database. Submission code: SUB2472808; Study: PRJNA378604 (Accession Number SRP101692). All STARR-seq files are accessible at GEO database (GEO number GSE96542).

**Funding:** This work was supported by SystemsX.ch IPhD to AF. Research in the laboratory of AS is supported by Boehringer Ingelheim GmbH, the European Research Council (ERC) under the European Union's Horizon 2020

## Abstract

The hallmark of canonical Wnt signaling is the transcriptional induction of Wnt target genes by the beta-catenin/TCF complex. Several studies have proposed alternative interaction partners for beta-catenin or TCF, but the relevance of potential bifurcations in the distal Wnt pathway remains unclear. Here we study on a genome-wide scale the requirement for Armadillo (Arm, *Drosophila* beta-catenin) and Pangolin (Pan, *Drosophila* TCF) in the Wnt/Wingless(Wg)-induced transcriptional response of *Drosophila* Kc cells. Using somatic genetics, we demonstrate that both Arm and Pan are absolutely required for mediating activation and repression of target genes. Furthermore, by means of STARR-sequencing we identified Wnt/Wg-responsive enhancer elements and found that all responsive enhancers depend on Pan. Together, our results confirm the dogma of canonical Wnt/Wg signaling and argue against the existence of distal pathway branches in this system.

## Author summary

Our manuscript addresses the question of whether either of the canonical transduction components, beta-catenin or TCF, can be bypassed when the Wnt pathway is activated. By using somatic cell genetics in *Drosophila* cells (via CRISPR/Cas9 editing) in combination with RNA-seq and STARR-seq (Self-transcribing-active-regulatory-region-sequencing) as functional read-outs, we provide firm evidence against the existence of distal branches in the Wnt pathway.

## Introduction

Wnt proteins are highly conserved signaling molecules specifying the fate and behavior of cells in multicellular animals ranging from nematodes to humans [1]. They play crucial roles in embryogenesis, pattern formation and tissue homeostasis during development and in adult life. Therefore it is not surprising that aberrant Wnt signaling has been found to be implicated in many human diseases [2].

research and innovation programme (grant agreement no. 647320), the Austrian Research Promotion Agency (FFG), and the Austrian Science Fund (FWF, F4303-B09). DS was supported by an ERC starting grant (no. 242922) awarded to AS. The funders had no role in study design, data collection and analysis, decision to publish, or preparation of the manuscript.

**Competing interests:** The authors have declared that no competing interests exist.

Following the identification of Wnt proteins nearly 40 years ago [3–5] genetic and biochemical studies have revealed mechanistic details of how the signaling cascade operates when cells receive a Wnt signal [for review see 6]. As a consequence of Wnt/Wg proteins binding their cognate receptors, beta-catenin is no longer marked for degradation and accumulates in the cytoplasm and nucleus [7–10]. In the prevailing model, TCF is targeted through its DNA binding domain to Wnt-responsive elements (WREs) in the promoters or enhancers of target genes [11] and initiates the transcription of Wnt/Wg-responsive genes when complexed with beta-catenin. In the absence of Wnt/Wg ligand, beta-catenin is phosphorylated and degraded while TCF is bound by transcriptional repressors, such as Groucho and Coop [12–15]. In contrast to the well-studied mechanism of gene activation, the mechanisms by which beta-catenin and TCF promote target gene repression are not well understood [16]. Several reports suggest that, in addition to beta-catenin and TCFs, other factors are involved in Wnt-mediated repression, such as Prop1, Mad or Zic [17–19]. Furthermore it is not clear, in which context alternative [20] or traditional TCF binding sites are used for transcriptional repression [21–23].

A recent study showed that TCF4 is a predominant factor in mediating the Wnt response and for recruiting beta-catenin to DNA [24], however ongoing research on the Wnt signaling pathway has repeatedly demonstrated that beta-catenin as well as TCF interacts with various other proteins. Yet it remains to be determined, whether alternative transcriptional complexes also regulate the expression of Wnt/Wg target genes. For example, an interaction between beta-catenin and FOXO-transcription factors in mouse and DLD-1 human colon carcinoma cells has been demonstrated resulting in the activation of genes involved in oxidative stress and colon cancer metastasis [25–27]. Furthermore in mouse embryonic stem cells it was shown that beta-catenin forms a complex with Oct4 to promote Oct4-driven transcription and pluripotency [28]. In addition, studies in *Xenopus* reported an interaction between beta-catenin and Sox17, promoting expression of Sox17 target genes [29], and more recently it was suggested that beta-catenin complexes with YAP1 and TBX5 in human cancer cell lines [30]. In addition, alternative binding partners have also been reported for TCF, such as Plakoglobin or Mad [31, 18].

In this study, we address the question of whether alternative routes exist that bypass beta-catenin or TCF to promote the transcription of Wnt/Wg target genes in *Drosophila* cells. Using cells that lack either Arm or Pan and functional read-outs (i.e. RNA-seq and STARR-seq), we show that both, Arm and Pan, are absolutely required for target gene activation and repression. Consistent with these findings, we further demonstrate that Wnt/Wg-responsive enhancers also require Pan, arguing against the existence of distal branches in the Wnt signaling pathway.

## Results

### Genome-wide identification of Wnt/Wg target genes by RNA-sequencing

Next-generation RNA-sequencing (RNA-seq) was used to identify and quantify the expression of target genes of the Wnt/Wg signaling pathway in *Drosophila* Kc167 cells. Cells were treated either with Wg-enriched medium (referred to as Wingless-conditioned medium, WCM; [32]), or control-conditioned medium (CM) lacking the Wg ligand. Wg-responsive genes were determined by statistical analysis of gene expression levels in treated samples versus control samples, according to a protocol described in [33]. In order to determine a high confidence set of Wnt/Wg targets, genes had to pass the following selection criteria: exhibit a significantly altered expression profile (WCM vs CM,  $p$ -value  $\leq 0.0005$ ) and an at least two-fold change of expression upon Wg stimulation (Fig 1A). WCM-treatment resulted in the robust induction of 51 genes. Among them we found previously identified Wnt/Wg target genes such as *naked*

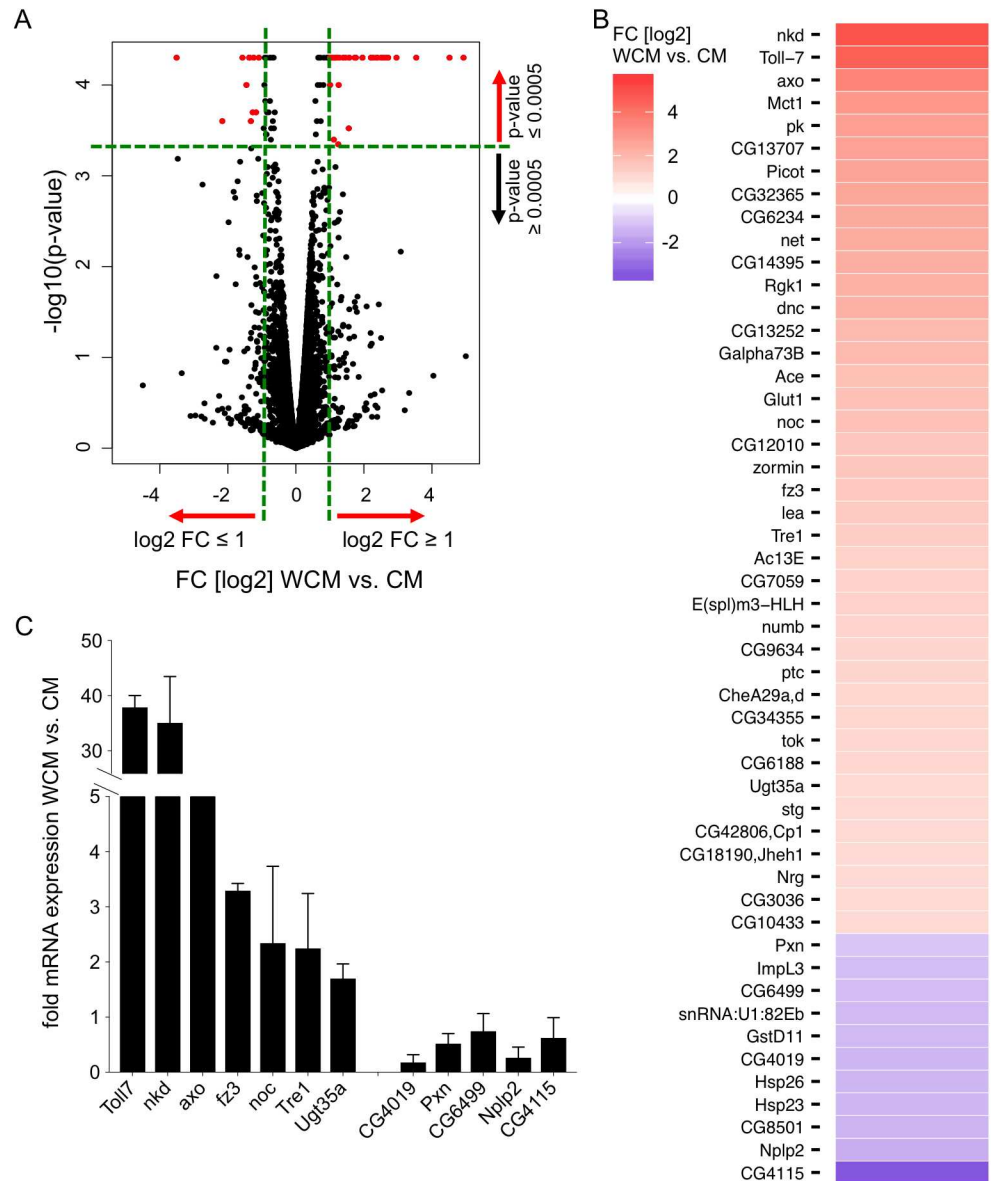

**Fig 1. Identification of Wnt/Wg-responsive genes.** (A) Volcano plot showing the log<sub>2</sub> fold change (x-axis) and statistical significance (y-axis; -log<sub>10</sub> p-value) of Wnt/Wg-responsive genes. 51 genes were significantly differently expressed after WCM-treatment (red dots), 40 genes showed an up-regulation (positive targets), 11 genes were down-regulated (negative targets) after WCM treatment. Black dots represent all genes that showed an altered expression profile. (B) Heatmap showing the log<sub>2</sub> fold change (FC) of expression of the 51 Wnt/Wg-responsive genes in wild-type cells (WT). The expression profile of positive target genes is depicted in red, the expression profile of negative targets is in blue. (C) Confirming of candidate genes using qRT-PCR. *Drosophila* Kc cells were stimulated with WCM or CM for 24 h. Analysis of expression profiles of candidate target genes (7 positive and 5 negative) after treatment versus control confirmed their induction after WCM stimulation.

<https://doi.org/10.1371/journal.pgen.1006700.g001>

*cuticle* (*nkd*), *CG6234*, *frizzled 3* (*fz3*) and *Peroxidasin* (*Pxn*) [34–36, 20], confirming our quality filters. 40 genes were at least two fold up-regulated (positive targets) and 11 genes two fold down-regulated (negative targets) (Fig 1B). 7 positive and 5 negative candidate target genes were confirmed by qRT-PCR (Fig 1C). This high confidence set of Wnt/Wg target genes was

used to systematically elucidate potential beta-catenin or TCF-independent branches of Wnt/Wg signaling.

## An absolute requirement for Armadillo for activation and repression of Wg target genes

To investigate whether Arm can be bypassed via alternative branches of the pathway, we generated *arm* knockout cells using the CRISPR/Cas9 technology as described by Bassett and colleagues [37]. In order to generate *Drosophila arm* null mutant cells we used sgRNAs targeting two different exons that are present in all transcript variants (Fig 2A and 2B). sgRNA-a1 on the reverse strand targets the translational start site residing in exon 2. sgRNA-a2 targets a site in the third exon. The presence of CRISPR-induced mutations generated by NHEJ (non-homologous end joining) was assessed by sequencing of the PCR products spanning the sgRNA target sites (see Material and Methods). The analysis revealed that most of the alleles had indel mutations at the expected cleavage sites, some of which lead to the deletion of the translational start site or to frameshifts in exon 3. To generate an *arm*<sup>-/-</sup> cell line, we carried out serial dilutions and searched for cell populations that carried previously identified mutations using allele-specific primers as described in [38]. In this way, we isolated an *arm* null mutant cell line (named *arm*<sup>-/-AF117/8</sup>) which was a homogenous cell population (see Material and Methods) carrying a deletion of either one or sixteen nucleotides in the second exon, each of them destroys the START codon (ATG), and a deletion of one nucleotide in the third exon (Fig 2B). Importantly no wild-type alleles were present. These mutations, affecting both *arm* alleles, result in frameshift mutations introducing a premature termination codon that should trigger nonsense-mediated mRNA decay (NMD) [39] (S1A Fig). We confirmed the complete loss of Arm protein in *arm*<sup>-/-AF117/8</sup> cells by Western blot analysis (Fig 2C, S1B Fig).

Next we investigated whether Arm is absolutely required for the Wnt/Wg-driven transcriptional output. To that end *arm*<sup>-/-AF117/8</sup> cells were treated either with WCM or CM and target gene responses were monitored by RNA-seq. We found that the induction of the positive Wnt/Wg target genes is dependent on Arm, since their expression was not changed in *arm* null mutant cells. Similarly all negative target genes are no longer repressed in *arm*<sup>-/-AF117/8</sup> cells (Fig 3A and 3B). These results demonstrate that Arm is absolutely necessary for both, activation and repression of identified Wnt/Wg targets. We confirmed our results with qRT-PCR analysis of 11 candidate targets genes (S2 Fig).

## Requirement of Pangolin for transcriptional regulation of Wg target genes

From the analysis above, we conclude that Arm is absolutely required for both activation and repression of Wnt/Wg target genes and interpret this as evidence against the existence of an Arm-independent Wnt/Wg signaling transcriptional output. Since several alternative interaction partners for beta-catenin have been proposed for the activation and the repression of genes, such as Sox17 [29], Oct4 [28] and Prop1 [17], we next asked whether TCF-independent Wnt/Wg signaling exists. To search for TCF-independent Wnt/Wg signaling, we utilized a similar setup as described above to generate *pan* null mutant cells. Two distinct sgRNAs were used to target independent loci within the *pan* gene (Fig 4A). We isolated a population of *pan* null mutant cells that no longer contain any wild-type allele. Similar to the *arm*<sup>-/-AF117/8</sup> cells, the selected *pan* null mutant cells, termed *pan*<sup>-/-AF1AD26</sup>, carry three defined mutations that lead to frameshift mutations. Molecular analysis of the alleles revealed no wild-type allele but a large deletion of approximately 9 kb spanning the two selected CRISPR sites (Fig 4B). In addition, *pan*<sup>-/-AF1AD26</sup> cells also harbor two distinct frameshift mutations in the HMG box, both

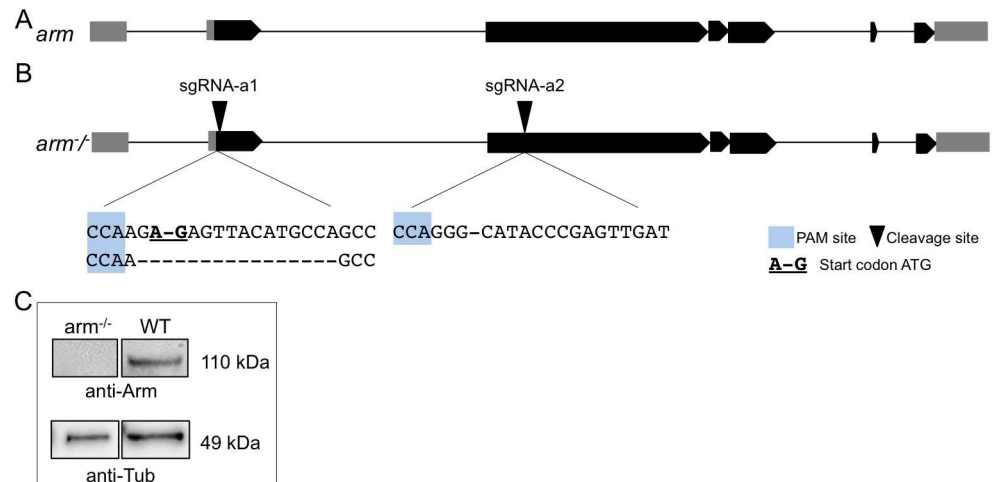

**Fig 2. Mutagenesis of the *arm* gene.** (A) Schematic of the *arm* gene-locus. Untranslated regions (UTR) are indicated in grey boxes, translated exons in black. (B) CRISPR targeting strategy: Target sites of both sgRNAs are represented by black triangles. The PAM site is highlighted in blue. Sequences as they are present in *arm*<sup>-AF117/8</sup> (*arm*<sup>-/-</sup>) cells are depicted below. Bold and underlined nucleotides represent the TSS. (C) Western blot analysis using an  $\alpha$ -Arm antibody on lysates from wild-type (WT) and *arm*<sup>-AF117/8</sup> (*arm*<sup>-/-</sup>) cells. As expected the *arm*<sup>-AF117/8</sup> (*arm*<sup>-/-</sup>) cells are devoid of Arm protein. Tubulin was used as loading control.

<https://doi.org/10.1371/journal.pgen.1006700.g002>

of which result in premature termination codons (S3A Fig) and NMD. Consistent with this qRT-PCR analysis showed a reduction of *pan* mRNA in knockout cells compared with wild-type cells (S3B Fig). The presence of the three *pan* mutant alleles suggests that at the *pan* locus Kc cells are polyploid; segmental polyploidy has been reported for Kc cells [40]. Since no anti-Pan antibodies were available to confirm the absence of functional Pan protein we used the *wingful* luciferase reporter assay, an artificial built reporter giving a robust and high Wg-response [41]. Consistent with the absence of Pan, in *pan*<sup>-AF1AD26</sup> cells the *wingful* reporter could no longer be induced after WCM-stimulation; responsiveness could be restored by Pan overexpression (Fig 4C and 4D).

To answer the question of whether Pan is dispensable for Wnt/Wg-regulated induction of target genes, we treated *pan*<sup>-AF1AD26</sup> cells with either WCM or CM and performed RNA-seq. We observed that *pan*<sup>-AF1AD26</sup> cells can no longer transduce the Wnt/Wg signal as expression of none of the identified Wnt/Wg targets was altered. Neither positive nor negative Wnt/Wg-target genes significantly changed their expression profile in *pan* knockout cells after Wg stimulation providing evidence that Pan is indispensable for the activation and repression of Wnt/Wg target genes (Fig 5A and 5B). The lack of a change in the expression of several candidate Wnt/Wg targets was confirmed by qRT-PCR (S2 Fig).

### De-repression in the absence of Pan

Like most major developmental signaling pathways, the Wnt/Wg system uses a “transcriptional switch” mechanism to positively regulate target gene expression [42]. In the absence of Wnt/Wg signaling, the transcription of target genes is repressed by Pan via its interaction with co-repressors such as Groucho or Coop [13, 15]. Pan turns into an activator when complexed with Arm following pathway activation. It has been shown that loss of Pan function leads to de-repression of the Wg target genes *nkd* and *CG6234* in the Wg OFF state *in vivo* and *in vitro* [35, 43]. To determine whether this mode of action is valid for the entire set of identified Wnt/Wg target genes we compared the gene expression profiles of wild-type and *pan*<sup>-AF1AD26</sup> cells

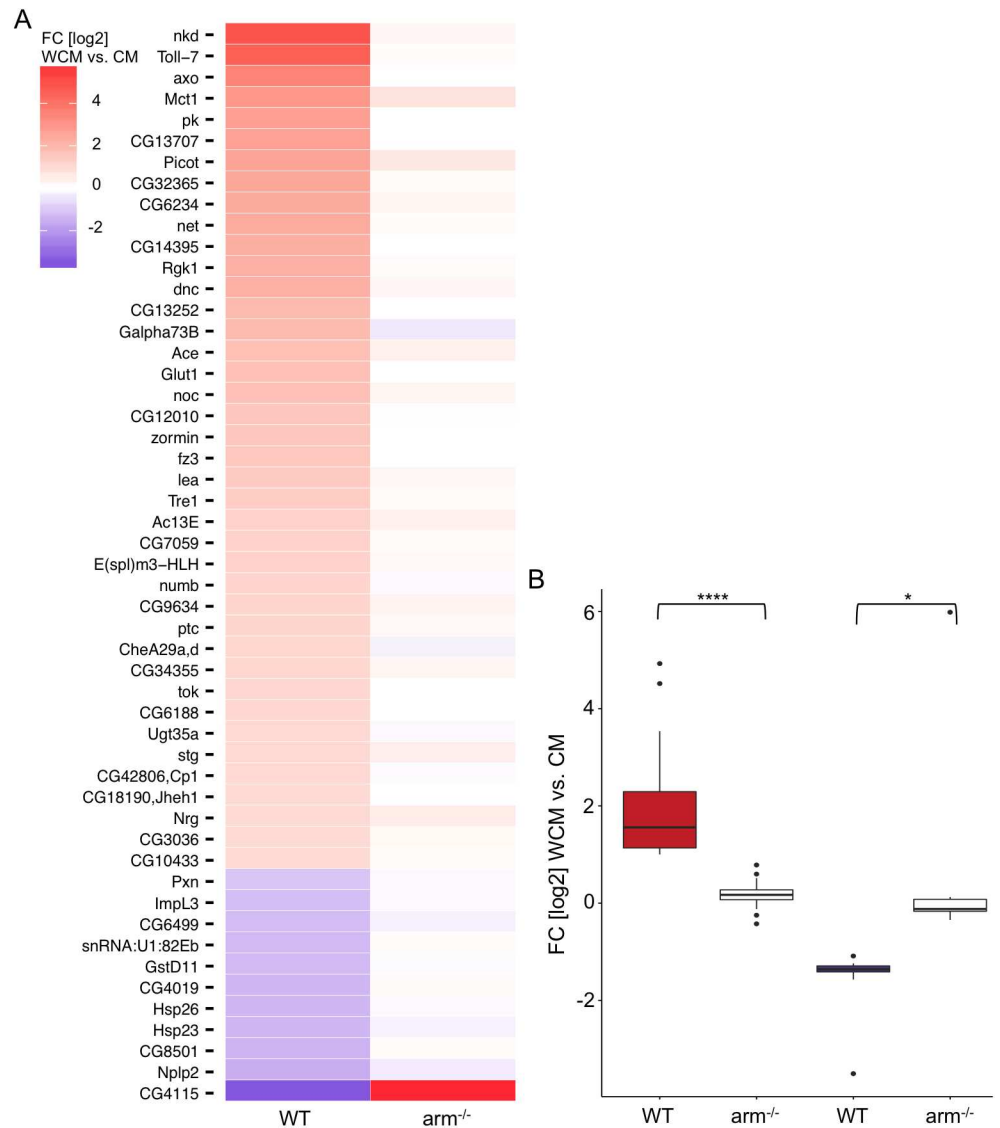

**Fig 3. Gene expression analysis of Wg/Wnt target genes in  $arm^{-/-AF117/8}$  cells.** (A) Heat map of Wnt/Wg target genes showing their log<sub>2</sub> fold change (FC) of expression after to before WCM treatment in wild-type (WT) and  $arm^{-/-AF117/8}$  ( $arm^{-/-}$ ) cells. The genes are listed according to the strength of the induction of their expression in WT cells. Strongest up-regulated genes are on top. Up-regulated genes are shown in red, down-regulated genes in blue, no expression in white. (B) Boxplots showing the difference in gene activity for up- and down-regulated genes after WCM stimulation in wild-type (WT) and  $arm^{-/-AF117/8}$  ( $arm^{-/-}$ ) cells. Paired t-test: \*  $\leq 0.05$ , \*\*\*\*  $\leq 0.0001$ .

<https://doi.org/10.1371/journal.pgen.1006700.g003>

in the absence of Wnt/Wg signaling. Interestingly, we found that only a fraction (37.5%) of positive target genes were de-repressed in *pan* null mutant cells (Fig 5C; fold change  $\geq 2$ ; p-value  $\leq 0.0005$ ); among them were *nkd* and *CG6234* [35]. We also noted that this set of de-repressed genes is highly induced in the presence of Wg ligand (Fig 5C). In contrast, the absence of Pan had no effect on the basal expression of the other (the majority) target genes. However, we also identified some genes exhibiting reduced levels of expression in unstimulated *pan* knockout cells (Fig 5C), suggesting that Pan might be required for their transcription in the absence of Wnt/Wg signaling. Blauwkamp and colleagues (2008) proposed this mode of

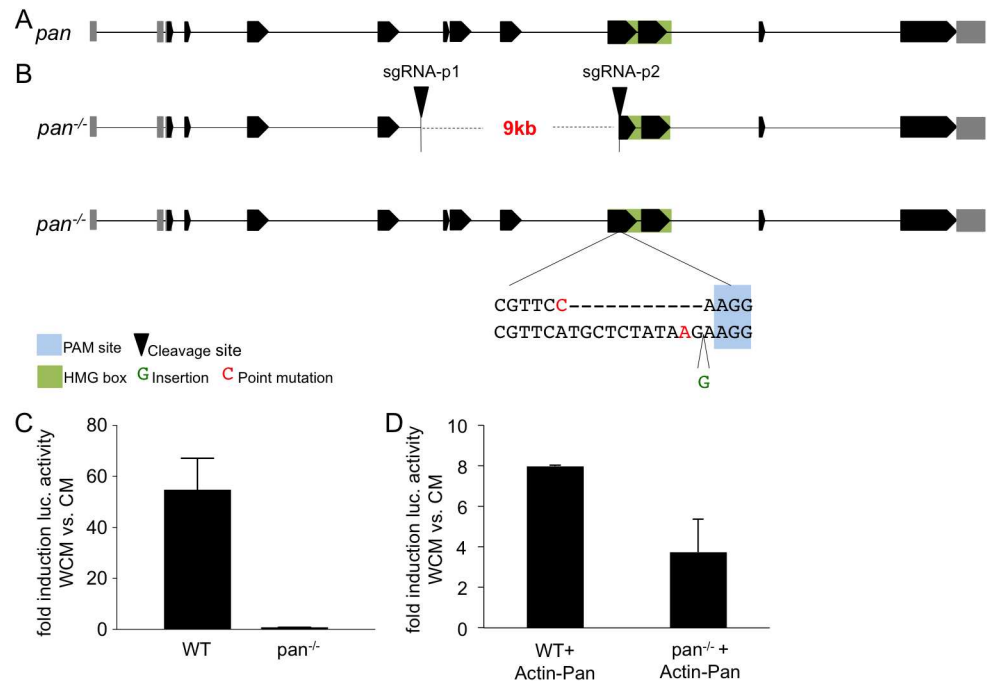

**Fig 4. Mutagenesis of the *pan* gene.** (A) Schematic of the *pan* gene-locus. Untranslated regions (UTR) are indicated in grey boxes, translated exons in black. HMG box in green. (B) CRISPR targeting strategy: Target sites of both sgRNAs are represented by black triangles. The PAM site is highlighted in blue, the HMG box in green. Sequences as they are present in the pan<sup>-/-AF1AD26</sup> (pan<sup>-/-</sup>) cells are depicted below. (C) Wild-type (WT) and pan<sup>-/-AF1AD26</sup> (pan<sup>-/-</sup>) cells were transfected with the *wingful* luciferase reporter expression vector and Renilla expression vector 24 h prior stimulation with WCM (as control CM was used). After 24h stimulation, reporter activity was analyzed. (D) Wild-type (WT) and pan<sup>-/-AF1AD26</sup> (pan<sup>-/-</sup>) cells were transfected with Pangolin overexpression vector under the control of the Actin promoter together with *wingful* luciferase reporter expression vector and Renilla expression vector 24 h prior stimulation with WCM (as control CM was used). After 24h stimulation, reporter activity was analyzed.

<https://doi.org/10.1371/journal.pgen.1006700.g004>

action for Pan in *Drosophila* Kc cells for several negative target genes, when cells were not exposed to Wnt/Wg [20].

### Genome-wide identification of Wnt/Wg-responsive enhancers

Transcription factors bind to specific signal responsive elements in the promoters or enhancers of target genes in order to regulate their expression [44]. So far we have analyzed in detail the Wnt/Wg-triggered transcriptional output and demonstrated that both, Arm and Pan are absolutely required for the activation and repression of Wnt/Wg target genes in *Drosophila* cells. However, in order to obtain a more complete understanding of the transcriptional regulation of Wnt/Wg target genes, we carried out Self-transcribing-active-regulatory-region-sequencing (STARR-seq), a genome-wide enhancer activity assay that reveals the identity of DNA sequences that can function as enhancers in a particular cell type [45–46] and in response to external stimuli, such as the insect steroid hormone ecdysone [47]. To identify enhancers whose activity changes in response to the Wnt/Wg signal, we performed STARR-seq under conditions of active Wnt/Wg signaling and under control conditions (Fig 6A, S4A Fig). For technical reasons, we used the Gsk3β-inhibitor CHIR99021 (CHIR)—a widely used alternative inducer of Wnt-signaling to stimulate Wg signaling in the STARR-seq experiments [48, 49] (see Material and Methods), whose activity we compared to WCM by using the

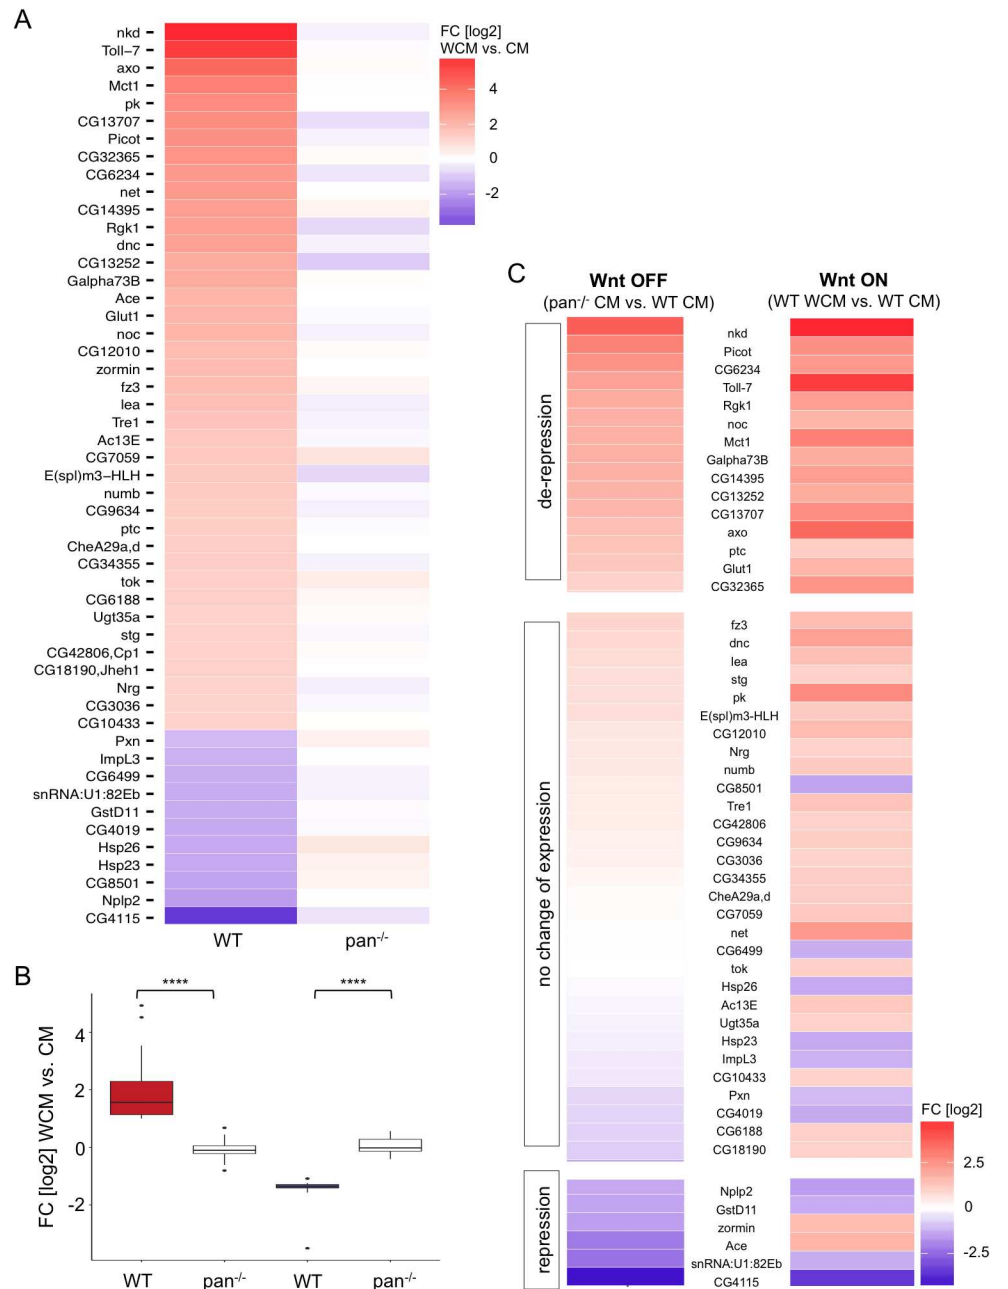

**Fig 5. Gene expression analysis of Wnt/Wg target genes in pan<sup>-/-</sup>AF1AD26 cells.** (A) Heat map of Wnt/Wg target genes showing their log<sub>2</sub> fold change (FC) of expression after WCM treatment versus control treatment in wild-type (WT) and pan<sup>-/-</sup>AF1AD26 (pan<sup>-/-</sup>) cells, respectively. The genes are listed according to their intensity of induction in WT cells. Strongest up-regulated genes are on top. Up-regulated genes are shown in red, down-regulated genes in blue, no expression in white. (B) Boxplots showing the difference in gene activity for up- and down-regulated genes after WCM stimulation in wild-type (WT) and pan<sup>-/-</sup>AF1AD26 (pan<sup>-/-</sup>) cells. Paired t-test: \*\*\* ≤ 0.0001. (C) Gene expression analysis of Wnt/Wg target genes in the Wnt OFF and Wnt ON state. Heat map of log<sub>2</sub> fold change (FC) according to the genotype (pan<sup>-/-</sup>AF1AD26 (pan<sup>-/-</sup>) CM vs. wild-type (WT) CM) or WCM treatment (wild-type WCM vs. wild-type CM). The genes are listed according to their expression levels in the Wnt OFF state. Up-regulated genes are in blue, down-regulated genes in red, no expression in white. De-repression: fold change (log<sub>2</sub>) ≥ 1, p-value ≤ 0.0005, repression: fold change (log<sub>2</sub>) ≤ -1, p-value ≤ 0.0005.

<https://doi.org/10.1371/journal.pgen.1006700.g005>



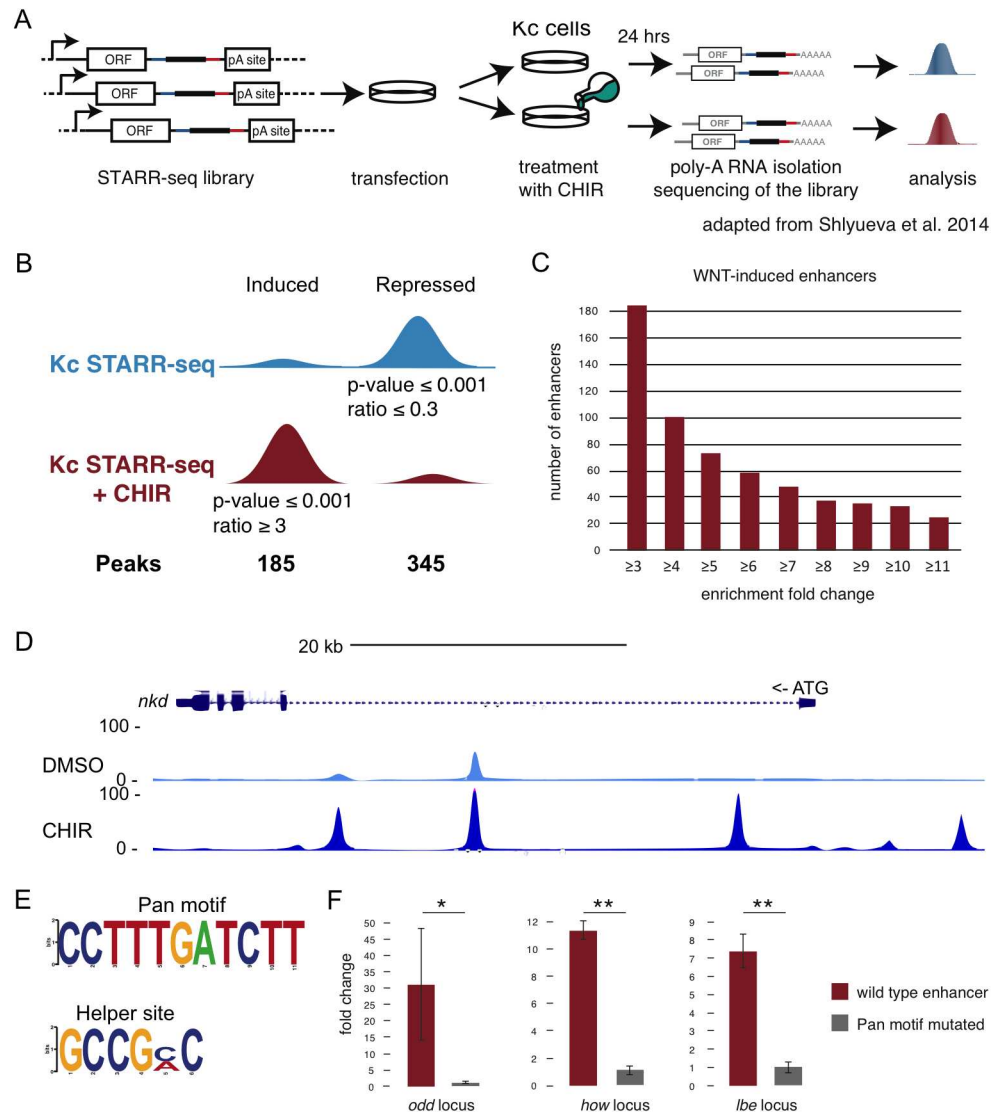

**Fig 6. Identification of Wnt/Wg-responsive enhancers.** (A) Schematic overview of the STARR-seq experimental setup (adapted from [45]). (B) Cartoon representing STARR-seq peaks that were induced or repressed after activation of the Wnt/Wg pathway and the number of such peaks. (C) Distribution of induced peaks according to their fold induction. (D) UCSC genome browser screenshot of STARR-seq tracks in the *nkd* gene loci. (E) PWM logos for the Pan and Helper motif. (F) Fold induction of normalized luciferase signal for induced enhancers near *odd*, *how* and *lbe* genes. In red: wild-type sequences; in grey: sequences with mutated Pan motif. All DNA sequences are listed in S3 Table. Paired t-test: \*p-value = 0.01; \*\*p-value  $\leq 10^{-4}$ . Data are shown as mean  $\pm$  SD of two experiments.

<https://doi.org/10.1371/journal.pgen.1006700.g006>

*wingful* reporter (S5A Fig). Furthermore, treatment with CHIR robustly induced expression of known Wg targets in *Drosophila* cells (S5B and S5C Fig).

Activation of the Wnt/Wg signaling pathway led to robust changes in enhancer activities: we identified 185 STARR-seq peaks (p-value  $\leq 0.001$ ) that were at least 3-fold induced in the CHIR-treated versus control sample, and 348 that were at least 3-fold repressed (Fig 6B). Among the induced peaks, 73 (39.5%) were induced more than 5-fold and 32 (17.2%) more than 10-fold (Fig 6C). We found several enhancers, which have already been described as WREs in *Drosophila* Kc cells. For instance we identified two enhancers close to the TSS of *nkd*

(first intron and 10 kb upstream of TSS) (Fig 6D), the well-studied WRE 2.2 kb upstream of the TSS (transcription start site) of *Notum*, an enhancer 15.2 kb upstream of *pxb* and an element in the 5' intergenic region 178 bp upstream of *Ugt36Bc* [50, 43, 20] (S4B Fig). We validated activated and repressed STARR-seq enhancers in luciferase reporter assays as described in [47]. Consistent with the STARR-seq results, we found luciferase reporter activities responded as expected to both CHIR treatment and WCM treatment: increased activity for activated enhancers and decreased activities for repressed enhancers (S4C and S6 Figs). Taken together, these results indicate that the activities of STARR-seq detected enhancers are modulated by Wnt/Wg signaling.

### The TCF/Pan motif is necessary for Wnt/Wg-induced enhancers

To further test that the identified enhancers were directly regulated by Pan, we assessed the enrichment of known transcription factor motifs [46] in Wnt/Wg-responsive STARR-seq enhancers in comparison to negative control sequences (see [Material and Methods](#)). The known TCF/Pan motif [51] (Fig 6E) was strongly enriched in induced enhancers (2.7-fold enrichment, p-value =  $1.3 \times 10^{-8}$ ), whereas it was not enriched in constitutive or repressed enhancers (p-value = 0.27 and p-value = 0.08, respectively). Using *de novo* motif discovery (see [Material and Methods](#)) we found an additional Helper site motif in induced enhancers (GCCGCC, p-value =  $3.4 \times 10^{-14}$ ; Fig 6E), which is a GC-rich element near TCF/Pan binding sites that is critical for Wnt/Wg target gene activation [52–53, 11]. To experimentally validate the necessity of the TCF/Pan motif for Wnt/Wg induced enhancers, we tested wild-type and mutated versions of the TCF/Pan motif in 3 enhancers of the *odd*, *how* and *lbe* genes in luciferase assays. While the wild-type enhancers activated luciferase reporters 31-, 11- and 7-fold after Wnt/Wg induction by CHIR treatment, the Pan motif-mutant sequences did not respond to treatment (<1.2-fold induction), a substantial and significant difference in each case (p-value  $\leq 0.01$ ; Fig 6F), indicating that at least these 3 Wnt/Wg-responsive enhancers require the TCF/Pan motif.

### Pan regulates Wnt/Wg-responsive enhancers

Given the enrichment of the TCF/Pan motif in the Wnt/Wg-responsive STARR-seq enhancers and the necessity of this motif for enhancer function, we next examined whether Wnt/Wg-responsive enhancers require the Pan protein. We repeated the STARR-seq experiments in *pan* null mutant cells (S7A Fig) and again confirmed our findings for a subset of the enhancers by treatment with WCM (S6 Fig). Consistent with our analysis of target gene expression by RNA-seq, we found that enhancer-induction was overall strongly reduced from 26.1-fold the highest induction in wild-type cells to at most 3.8-fold in *pan* null mutant cells and that the vast majority (80%) of Wnt/Wg-induced enhancers no longer responded to pathway activation (Fig 7A). For example, the enhancers in first intron and 10 kb upstream of TSS in the *nkd* gene locus that were strongly induced in wild-type cells by Wnt/Wg signaling were not any more induced nor detected in *pan* knockout cells (p-value  $> 0.001$ ; Fig 7B). We confirmed these findings by testing several of the most strongly activated enhancers in luciferase reporter assays. In agreement with the STARR-seq results, enhancers that were strongly activated by Wnt/Wg signaling in wild-type cells did not respond to Wnt/Wg pathway activation in *pan* knockout cells (S7B Fig). Taken together, these results argue that Pan is required for the activation of Wnt/Wg-responsive enhancers.

## Discussion

According to the generally accepted dogma the canonical Wnt signaling pathway culminates in the transcriptional induction of target genes via the beta-catenin/TCF complex. During the

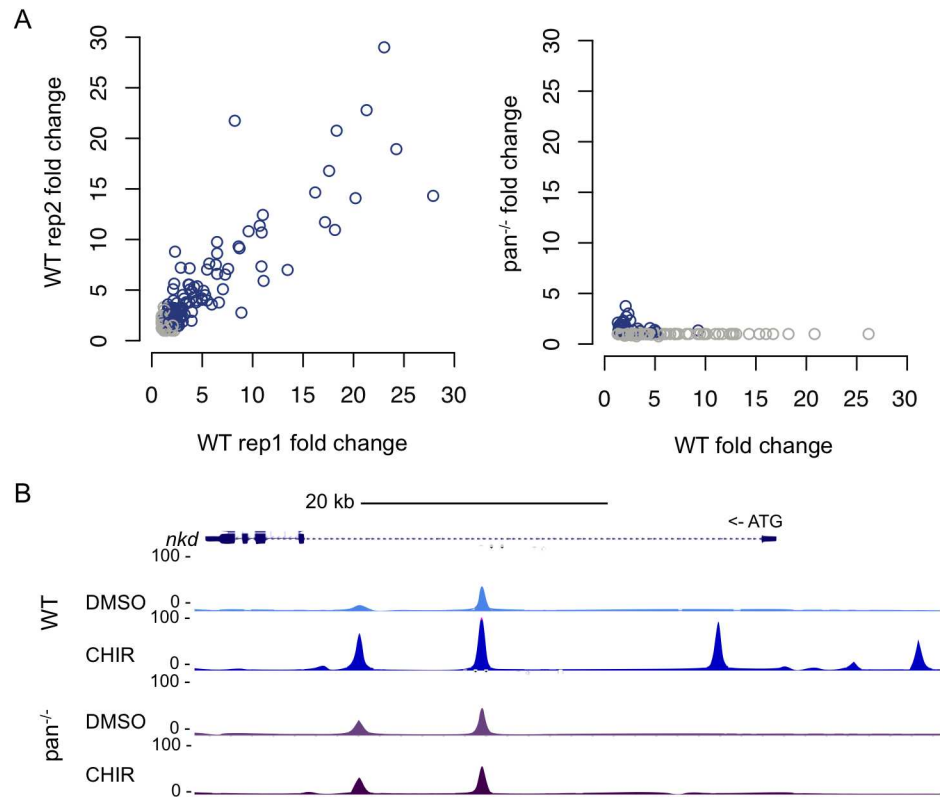

**Fig 7. Wnt/Wg-induced enhancers depend on Pan.** (A) Scatterplots show signal fold induction at induced enhancers for STARR-seq replicates in wild-type (WT) cells (left) and for comparison of WT versus pan<sup>-/-</sup>AF1AD26 (pan<sup>-/-</sup>) cells (right). Grey dots indicate non-significant induction (p-value>0.001). (B) UCSC browser screenshot of STARR-seq tracks in WT and pan<sup>-/-</sup>AF1AD26 (pan<sup>-/-</sup>) cells for *nkd* gene locus.

<https://doi.org/10.1371/journal.pgen.1006700.g007>

past decade, several alternative configurations of the Wnt pathway have been proposed in which either beta-catenin or TCF is bypassed. A recent study explored the co-occupancy of TCF4 and beta-catenin using CHIP-seq and showed that TCF4 is the major factor in tethering beta-catenin to DNA [24]. However, the study could not exclude the possibility that other putative factors could compensate the lack of TCF or beta-catenin—an aspect that is still poorly understood in the field of Wnt research. In the present study, we investigate whether and, if yes, to which extent a Wnt response can bypass beta-catenin or TCF. To this aim we used somatic cell genetics in *Drosophila* cultured cells. As a basis for our analysis, we first carried out a systematic and genome-wide study to explore all Wnt/Wg-related transcriptional outputs in this system. We identified a set of 51 genes that are induced upon Wg stimulation. To probe whether their expression requires Arm or Pan, we generated cells lacking one or the other of these factors using the CRISPR/Cas9 technology. Surprisingly, we found that Arm and Pan are both absolutely required for all Wnt/Wg-related transcriptional outputs in this system. As a transcription factor, Pan binds to DNA regulatory elements up- or downstream of the TSS of its target genes. Thus, next we asked, whether these DNA regulatory elements—enhancers/repressors—are dependent on Pan using STARR-seq. Impressively, consistent with our RNA-seq analysis, we found that the induction of Wnt/Wg-responsive enhancer elements fully depends on Pan.

In our work we identified eleven down-regulated target genes and showed that knockout of Arm or Pan is sufficient to abrogate their repression. We observed the same effect for

repressed enhancers in *pan* null mutant cells. These findings are in line with a previous study in *Drosophila* Kc cells [20], in which it was shown that Pan and Arm are required for the repression of the negative target genes *Pxn*, *Ugt36Bc*, *Tig* and *Ugt58Fa* [20]. We also found *Pxn* in our Wnt/Wg target gene set. However, the other genes were less than 2-fold repressed in our system and thus did not pass our selection criteria. This might be due to technical differences in Wnt-pathway stimulation and/or timing. Blauwkamp and colleagues showed also in their study that the negatively regulated targets exhibited lower expression upon Pan reduction in the Wnt OFF state [20], implicating that Pan normally activates their expression even in the absence of Wg ligand. When analyzing our data, we found that only half of the negative target genes appear to be activated in the Wnt OFF state upon Pan abrogation, the remaining targets did not exhibit a significant change in their expression profile. This suggests that they might be indirect targets or independent of Pan. Furthermore, we found that several repressed enhancers possess neither the traditional TCF/Pan binding motif, nor the previously reported alternative binding site important for repression, indicative for a Pan-dependent indirect regulation of repressed enhancers. It is likely that Pan is tethered to the DNA by other co-factors as it was shown for *dpp* or *CDH1* [21, 23]. Thus, these Pan-dependent enhancers without any known TCF/Pan binding site provide a good starting point for further molecular studies to gain insight into the still incomplete model of Wnt-mediated repression [16].

In sum our results demonstrate that all Wnt/Wg-related transcriptional output in *Drosophila* cells requires Arm and Pan and that the induction of Wnt/Wg-responsive enhancers is fully dependent on Pan. Hence, collectively our data argue against the existence of distal branching of the Wnt pathway in this system.

## Materials and methods

### *Drosophila* cell culture

*Drosophila* Kc167 cell lines were cultured in M3+BYPE medium, supplemented with 5% fetal bovine serum (FBS) and 1% penicillin and streptomycin at 25°C.

### Activating Wnt signaling in *Drosophila* Kc cells

Wg-CM was harvested from S2 tubulin wingless cells. S2 tubulin wingless cells were seeded 24 h prior collecting the supernatant ( $1 \times 10^6$  cells/ml) by centrifuging the cells at 3500 rpm for 5 min. For the control medium S2 cells were prepared as described above. WCM or CM was added to Kc cells for 24 h to induce Wnt/Wg signaling. To induce the Wnt/Wg signaling pathway with CHIR99021 (S1263, Selleckchem), 25  $\mu$ M of the inhibitor was used and added to the medium for 24h. As control DMSO was used. After 24 h of induction, cells were harvested.

### Cas9 and gRNA plasmids

Cas9 (49330, Addgene) and empty gRNA vector (49410, Addgene) were obtained from Addgene. Oligo design and cloning was accomplished after manufacturer's protocol.

### Mutagenesis of genes with CRISPR/Cas9

CRISPR was performed as described in [37]. Briefly, cells were plated at  $2 \times 10^6$  cells per well of a 6-well dish and a total of 1.7  $\mu$ g DNA, Cas9 and gRNA in a 1:1 ratio, was co-transfected into each well using Fugene HD (Promega) at a 1:2 ratio ( $\mu$ g: $\mu$ l), following manufacturer's instructions. Both gene loci were targeted simultaneously using a gRNA and Cas9 with integrated gRNA. Transfections were analyzed after 3 days, and selection was performed in 5  $\mu$ g/ml Puromycin (P8833 Sigma). The genotype was analyzed using PCR primers spanning the cut site.

PCR products were cloned in pGEMT-vector system (Promega) and 10–100 clones were analyzed by sequencing. Primers for gRNA cloning and for detection of CRISPR events are available in the [S1 Table](#).

### Western blot

Nuclear protein extraction was performed as described in [54]. For Western blot analysis, monoclonal anti-Arm (1:500; N2(7A1), DSHB) and monoclonal anti-alpha-Tubulin (1:5000; T5168, Sigma) antibodies were used and followed by HRP-anti-mouse IgG (705-035-003, Jackson Immuno Research Laboratories, inc).

### qRT-PCR

Real-time q-PCR analyses were carried out with SYBR Green Supermix (BioRad) on a iCycler iQ real-time OCR detection system (BioRad). For qRT-PCR, total RNA was extracted from  $1-2 \times 10^6$  cells with NucleoSpin RNA extraction kit from Macherey-Nagel according to the manufacturer's protocol and reverse transcribed with Roche, followed by qRT-PCR. Sequences of the primer pairs used are listed in [S1 Table](#).

### RNA-seq

All pair-end sequencing was performed on an Illumina HiSeq2500 machine at the Genomics Platform of the University of Geneva. For all experiments we compared three independent biological replicates and merged them for the subsequent analysis. All RNA-seq files are available from SRA NCBI database. Submission code: SUB2472808; Study: PRJNA378604 (Accession Number SRP101692).

### Computational analysis

All deep-sequencing data were mapped to the *Drosophila* reference genome dm3 using TopHat and analyzed as described in [34] and using thresholds as indicated above. We used GraphPad Prism for all statistical analysis and R for plotting.

### STARR-seq

STARR-seq in *Drosophila* WT cells and *pan* knockout cells was performed in two biological replicates as described in [47]. To obtain Wnt-responsive enhancers, cells were treated with 25 $\mu$ M CHIR99021 or DMSO for 24h. Data were analyzed as described in [47]. For [Fig 7A](#) fold enrichments were calculated directly over DMSO-treated samples at summits of induced enhancers and p-values indicate significance of the fold change. All STARR-seq files are available at the GEO database (GEO number GSE96542).

### Motif analysis

For TCF/Pan motif enrichment analysis, we used 200 bp regions around the summit of 185 induced, 348 repressed, 1834 constitutive enhancers, and 987 random sequences that were not detected with STARR-seq but followed the same genomic distribution (denoted as negative regions). Enrichments were calculated as described [46]. *De novo* motif analysis was done with DREME using negative regions as a background set (see [S2 Table](#)).

## Reporter assay

Enhancer candidates were amplified from genomic DNA of *Drosophila* Kc167 cells (for primers see [S3 Table](#)). All candidates were subcloned to either pCR8/GW/TOPO (Invitrogen) or pENTR/TOPO (Invitrogen) and delivered into the firefly luciferase vector [45] using the Gateway LR Clonase II enzyme mix (Invitrogen). Kc cells ( $1 \times 10^5$ ) were transfected using Fugene HD (Promega) with a total of 300 ng of various plasmid combinations (1:3 ratio of promoter reporter plasmid to Renilla). Luciferase activities were measured 48 h after transfection and after stimulation with either Wg ligand or CHIR99012 using the Dual-Luciferase Reporter Assay System (Promega). Every experiment was repeated at least twice with three replicates in each independent experiment. Enhancers' sequences used are listed in [S3 Table](#).

## Supporting information

**S1 Fig.** (A) Schematic representation of potential protein products of Arm in  $arm^{-/-AF117/8}$  ( $arm^{-/-}$ ) cells with premature termination codons (stop), which result from introduced frameshift mutations. (B) Full Western blot analysis from [Fig 2](#). As presented in the blot, no truncated versions of Arm could be detected.

(TIF)

**S2 Fig.** qRT-PCR analysis of (A) positive and (B) negative candidate Wnt/Wg target genes in wild-type (WT),  $arm^{-/-AF117/8}$  ( $arm^{-/-}$ ) and  $pan^{-/-AF1AD26}$  ( $pan^{-/-}$ ) cells. Cells were stimulated with WCM or CM for 24 h. Analysis of expression profiles of several Wg target genes after treatment versus control confirmed their induction after WCM stimulation. Fold expression changes of mRNA were calculated by dividing WCM treatment-driven expression values by the expression values obtained with the control treatment.

(TIF)

**S3 Fig.** (A) Schematic representation of potential protein products of Pan in  $pan^{-/-AF1AD26}$  ( $pan^{-/-}$ ) cells with premature termination codons (stop) due to introduced frameshift mutations. (B) qRT-PCR analysis of *pan* mRNA level with primer targeting its N-term (see [S1 Table](#)) in wild-type (WT) and  $pan^{-/-AF1AD26}$  ( $pan^{-/-}$ ) cells. Cells were stimulated with WCM or CM for 24 h. Fold expression changes of mRNA were calculated by dividing WCM treatment-driven expression values by the expression values obtained with the control treatment.

(TIF)

**S4 Fig.** (A) Scatterplots of replicates of STARR-seq in wild-type (WT) cells treated with DMSO or CHIR99021 (CHIR). (B) UCSC browser screenshot of STARR-seq tracks in WT cells for *pxb*. (C) Validation of peaks from the constitutive, induced, and repressed enhancer classes by luciferase assays. Log<sub>2</sub> fold induction (CHIR-treated versus control) of normalized luciferase signal is shown. Wilcoxon rank-sum test: \*\*p-value = 0.0007, \*p-value = 0.003, n indicates the number of enhancers in each group.

(TIF)

**S5 Fig. CHIR99021 activates reliably and efficiently Wnt/Wg target genes in *Drosophila* cells.** (A) Titration of CHIR99021 in *Drosophila* S2R+ cells. S2R+ cells were transfected with *wingful* luciferase reporter vector and Renilla. Red bars: promoter activation with 25  $\mu$ M CHIR is as efficient as with Wg ligand. In green is the *wingful* promoter activity after stimulation with ArmS10 depicted, black bar shows the activity after control treatment, grey bars represent the activity after respective CHIR99021 concentration. (B, C) qRT-PCR analysis of gene expression in *Drosophila* Kc cells in the Wnt OFF and ON state. Fold change of gene expression levels were calculated using expression values after WCM (A) or CHIR (B) treatment

versus control treatments. Stimulation with WCM and CHIR leads to a similar robust expression of target genes *nkd*, *fz3* and *Toll-7* in wild-type cells.

(TIF)

**S6 Fig.** Validation of (A) induced and (B) repressed candidate STARR-seq enhancers with WCM. Candidate enhancer sequences were cloned into the STARR-seq library luciferase vector, see [Material and Methods](#). Wild-type (WT) and  $\text{pan}^{-/-\text{AF1AD26}}$  ( $\text{pan}^{-/-}$ ) cells were transfected with the candidate luciferase reporter expression vector and Renilla expression vector 24 h prior stimulation with WCM (as control CM was used). After 24h stimulation, reporter activity was analyzed.

(TIF)

**S7 Fig.** (A) Scatterplots of replicates of STARR-seq in  $\text{pan}^{-/-\text{AF1AD26}}$  ( $\text{pan}^{-/-}$ ) cells treated with DMSO or CHIR99021 (CHIR). (B) Validation of candidate STARR-seq enhancers. Candidate enhancer sequences were cloned into the STARR-seq library luciferase vector, see [Material and Methods](#). Wild-type (WT) and  $\text{pan}^{-/-\text{AF1AD26}}$  ( $\text{pan}^{-/-}$ ) cells were transfected with the candidate luciferase reporter expression vector and Renilla expression vector 24 h prior stimulation with CHIR (as control DMSO was used). After 24h stimulation, reporter activity was analyzed.

(TIF)

**S1 Table. Primer sequences for qRT-PCR, cloning of gRNAs, PCR.**

(XLSX)

**S2 Table. *de novo* motif search using DREME.**

(XLSX)

**S3 Table. Primer sequences for STARR-seq enhancer validations and Pan motif validation.**

(XLSX)

## Acknowledgments

We thank L. Gatti, C. von Mering and other members of the von Mering lab for their help with data analysis. We especially thank G. Hausmann for invaluable advice, critique and comments on the manuscript and the other members of the Basler lab for their suggestions and support.

## Author Contributions

**Conceptualization:** AF DS EB AS KB.

**Data curation:** AF DS AS.

**Formal analysis:** AF DS EB AS KB.

**Funding acquisition:** AS KB.

**Investigation:** AF DS EB AS KB.

**Methodology:** AF DS EB AS KB.

**Project administration:** AS KB.

**Resources:** AS KB.

**Software:** AF DS.

**Supervision:** EB AS KB.

**Validation:** AF DS EB AS KB.

**Visualization:** AF DS.

**Writing – original draft:** AF.

**Writing – review & editing:** AF DS EB AS KB.

## References

1. Cadigan K.M., and Nusse R. Wnt signalling: a common theme in animal development. *Genes Dev.* 1997; 11: 3286–3305. PMID: [9407023](#)
2. Clevers H., and Nusse R. Wnt/beta-catenin signaling and disease. *Cell* 2012; 149: 1192–1205. <https://doi.org/10.1016/j.cell.2012.05.012> PMID: [22682243](#)
3. Nusse R., and Varmus H. Many tumors induced by mouse mammary tumor virus contain a provirus integrated in the same region of the host chromosome. *Cell* 1982; 31: 99–109. PMID: [6297757](#)
4. Nüsslein-Vollhard C. and Wieschaus E. Mutations affecting segment number and polarity in *Drosophila*. *Nature* 1980; 287: 795–801. PMID: [6776413](#)
5. Rijsewijk F., Schuermann M., Wagenaar E., Parren P., Weigel D., and Nusse R. The *Drosophila* homology of the mouse mammary oncogene int-1 is identical to the segment polarity gene wingless. *Cell* 1987; 50: 649–657. PMID: [3111720](#)
6. Mosimann C., Hausmann G., and Basler K. Beta-catenin hits chromatin: regulation of Wnt target gene activation. *Nat. Rev. Mol. Cell Biol.* 2009; 10: 276–286. <https://doi.org/10.1038/nrm2654> PMID: [19305417](#)
7. Aberle H., Bauer A., Stappert J., Kispert A. and Kemler R. Beta-Catenin Is a Target for the Ubiquitin-Proteasome Pathway. *EMBO J.* 1997; 16(13): 3797–804. <https://doi.org/10.1093/emboj/16.13.3797> PMID: [9233789](#)
8. Ikeda S., Kishida S., Yamamoto H., Murai H., Koyama S. and Kikuchi A. Axin, a negative regulator of the Wnt signaling pathway, forms a complex with GSK-3beta and beta-catenin and promotes GSK-3beta-dependent phosphorylation of beta-catenin. *EMBO J.* 1998; 17(5): 1371–84. <https://doi.org/10.1093/emboj/17.5.1371> PMID: [9482734](#)
9. Hart M.J., de los Santos R., Albert I.N., Rubinfeld B. and Polakis P. Downregulation of beta-catenin by human Axin and its association with the APC tumor suppressor, beta-catenin and GSK3beta. *Curr Biol.* 1998; 8(10): 573–81. PMID: [9601641](#)
10. Valenta T., Hausmann G., and Basler K. The many faces and functions of beta-catenin. *EMBO J.* 2012; 31: 2714–2736. <https://doi.org/10.1038/emboj.2012.150> PMID: [22617422](#)
11. Chang M. V, Chang J.L., Gangopadhyay A., Shearer A., and Cadigan K.M. Activation of wingless targets requires bipartite recognition of DNA by TCF. *Curr. Biol.* 2008; 18: 1877–1881. <https://doi.org/10.1016/j.cub.2008.10.047> PMID: [19062282](#)
12. Brannon M., Gomperts M., Sumoy L., Gom M., Sum L., Moon R.T., et al. A beta-catenin / XTcf-3 complex binds to the siamois promoter to regulate dorsal axis specification in *Xenopus*. *Genes Dev.* 1997; 11: 2359–2370. PMID: [9308964](#)
13. Cavallo R.A., Cox T.R., Moline M.M., Roose J., Polevoy G.A., Clevers H., et al. *Drosophila* Tcf and Groucho interact to repress Wingless signalling activity. *Nature* 1998; 395: 604–608. <https://doi.org/10.1038/26982> PMID: [9783586](#)
14. Roose J., Molenaar M., Peterson J., Hurenkamp J., Brantjes H., Moerer P., et al. The *Xenopus* Wnt effector XTcf-3 interacts with Groucho-related transcriptional repressors. *Nature* 1998; 395: 608–612. <https://doi.org/10.1038/26989> PMID: [9783587](#)
15. Song H., Goetze S., Bischof J., Spichiger-Haeusermann C., Kuster M., Brunner E., et al. Coop functions as a corepressor of Pangolin and antagonizes Wingless signaling. *Genes Dev.* 2010; 24: 881–886. <https://doi.org/10.1101/gad.561310> PMID: [20439429](#)
16. Afolter M., Pyrowolakis G., Weiss A. and Basler K. Signal-Induced Repression: The Exception or the Rule in Developmental Signaling? *Dev. Cell.* 2008; 15(1): 11–22. <https://doi.org/10.1016/j.devcel.2008.06.006> PMID: [18606137](#)
17. Olson L.E., Tollkuhn J., Scafoglio C., Kronen A., Zhang J., Ohgi K.A., et al. Homeodomain-Mediated beta-Catenin-Dependent Switching Events Dictate Cell-Lineage Determination. *Cell* 2006; 125: 593–605. <https://doi.org/10.1016/j.cell.2006.02.046> PMID: [16678101](#)
18. Zeng Y. a, Rahnama M., Wang S., Lee W., and Verheyen E.M. Inhibition of *Drosophila* Wg Signaling Involves Competition between Mad and Armadillo/beta-Catenin for dTcf Binding. *PLoS One* 2008; 3: e3893. <https://doi.org/10.1371/journal.pone.0003893> PMID: [19065265](#)



19. Murgan S., Kari W., Rothbacher U., Iché-Torres M., Méléneć P., Hobert O., et al. Atypical Transcriptional Activation by TCF via a Zic Transcription Factor in *C. elegans* Neuronal Precursors. *Dev. Cell*. 2015; 33(6): 737–45. <https://doi.org/10.1016/j.devcel.2015.04.018> PMID: 26073017
20. Blauwkamp T. a, Chang M. V, and Cadigan K.M. Novel TCF- binding sites specify transcriptional repression by Wnt signalling. *EMBO J*. 2008; 27: 1436–1446. <https://doi.org/10.1038/emboj.2008.80> PMID: 18418383
21. Jamora C., DasGupta R., Kocieniewski P., and Fuchs E. Links between signal transduction, transcription and adhesion in epithelial bud development. *Nature* 2003; 422: 317–322. <https://doi.org/10.1038/nature01458> PMID: 12646922
22. Piepenburg O., Vorbrüggen G., and Jäckle H. Drosophila segment borders result from unilateral repression of hedgehog activity by wingless signaling. *Mol. Cell* 2000; 6: 203–209. PMID: 10949042
23. Theisen H., Syed A., Nguyen B.T., Lukacsovich T., Purcell J., Srivastava G.P., et al. Wingless directly represses DPP morphogen expression via an armadillo/TCF/Brinker complex. *PLoS One* 2007; 2: e142. <https://doi.org/10.1371/journal.pone.0000142> PMID: 17206277
24. Schuijers J., Mokry M., Hatzis P., Cuppen E., and Clevers H. Wnt-induced transcriptional activation is exclusively mediated by TCF/LEF. *EMBO J*. 2014; 33: 146–156. <https://doi.org/10.1002/emboj.201385358> PMID: 24413017
25. Essers M.A.G., de Vries-smits L.M.M., Barker N., Polderman P.E., Burgering B.M.T., and Korswagen H.C. Functional Interaction Between b-Catenin and FOXO in Oxidative Stress Signaling. *Science* 2005; 308: 1181–1184. <https://doi.org/10.1126/science.1109083> PMID: 15905404
26. Hoogeboom D., Essers M. a G., Polderman P.E., Voets E., Smits L.M.M., and Burgering B.M.T. Interaction of FOXO with beta-catenin inhibits beta-catenin/T cell factor activity. *J. Biol. Chem.* 2008; 283: 9224–9230. <https://doi.org/10.1074/jbc.M706638200> PMID: 18250171
27. Tenbaum S.P., Ordóñez-Morán P., Puig I., Chicote I., Arqués O., Landolfi S., et al. beta-catenin confers resistance to PI3K and AKT inhibitors and subverts FOXO3a to promote metastasis in colon cancer. *Nat. Med.* 2012; 18: 892–901. <https://doi.org/10.1038/nm.2772> PMID: 22610277
28. Kelly K.F., Ng D.Y., Jayakumaran G., Wood G. a, Koide H., and Doble B.W. beta-catenin enhances Oct-4 activity and reinforces pluripotency through a TCF-independent mechanism. *Cell Stem Cell* 2011; 8: 214–227. <https://doi.org/10.1016/j.stem.2010.12.010> PMID: 21295277
29. Sinner D., Rankin S., Lee M., and Zorn A.M. Sox17 and beta-catenin cooperate to regulate the transcription of endodermal genes. *Development* 2014; 131: 3069–3080.
30. Rosenbluh J., Nijhawan D., Cox A.G., Li X., Neal J.T., Schafer E.J., Zack T.I., et al. beta-Catenin-driven cancers require a YAP1 transcriptional complex for survival and tumorigenesis. *Cell* 2012; 151: 1457–1473. <https://doi.org/10.1016/j.cell.2012.11.026> PMID: 23245941
31. Zhurinsky J., Shtutman M., and Ben-Ze'ev A. Plakoglobin and beta -catenin: protein interactions, regulation and biological roles. *Journal of Cell Science* 2000; 113: 3127–3139. PMID: 10954412
32. van Leeuwen F., Samos C.H. and Nusse R. Biological activity of soluble wingless protein in cultured *Drosophila* imaginal disc cells. *Nature* 1994; 368: 342–344. <https://doi.org/10.1038/368342a0> PMID: 8127369
33. Trapnell C., Roberts A., Goff L., Pertea G., Kim D., Kelley D.R., et al. Differential gene and transcript expression analysis of RNA-seq experiments with TopHat and Cufflinks. *Nat. Protoc.* 2012; 7: 562–578. <https://doi.org/10.1038/nprot.2012.016> PMID: 22383036
34. Zeng W., Wharton K.A. Jr, Mack J.A., Wang K., Gadbow M., Suyama K., et al. Naked Cuticle encodes an inducible antagonist of Wnt signaling. *Nature* 2001; 403: 789–794.
35. Fang M., Li J., Blauwkamp T., Bhambhani C., Campbell N., and Cadigan K.M. C-terminal-binding protein directly activates and represses Wnt transcriptional targets in *Drosophila*. *EMBO J*. 2006; 25: 2735–2745. <https://doi.org/10.1038/sj.emboj.7601153> PMID: 16710294
36. Sivasankaran R., Calleja M., Morata G., and Basler K. The Wingless target gene *Dfz3* encodes a new member of the *Drosophila* Frizzled family. *Mech. Dev.* 2000; 91: 427–431. PMID: 10704878
37. Bassett A.R., Tibbit C., Ponting C.P., and Liu J.-L. Mutagenesis and homologous recombination in *Drosophila* cell lines using CRISPR/Cas9. *Biol. Open* 2014; 3: 42–49. <https://doi.org/10.1242/bio.20137120> PMID: 24326186
38. Liu J., Huang S., Sun M., Liu S., Liu Y., Wang W., et al. An improved allele-specific PCR primer design method for SNP marker analysis and its application. *Plant Methods* 2012; 8: 34. <https://doi.org/10.1186/1746-4811-8-34> PMID: 22920499
39. Popp M., W. and Maquat L., E. Leveraging Rules of Nonsense-Mediated mRNA Decay for Genome Engineering and Personalized Medicine. *Cell* 2016; 165: 1319–1322. <https://doi.org/10.1016/j.cell.2016.05.053> PMID: 27259145

40. Drosophila Genomics Resource Center. Kc167. 2017. Available from: <https://dgrc.bio.indiana.edu/cells/modencode/Protocol-Kc167>.
41. Kessler R., Hausmann G., and Basler K. The PHD domain is required to link Drosophila Pygopus to Legless/beta-catenin and not to histone H3. *Mech. Dev.* 2009; 126: 752–759. <https://doi.org/10.1016/j.mod.2009.04.003> PMID: 19493659
42. Barolo S. and Posakony J.W. Three habits of highly effective signaling pathways: principles of transcriptional control by developmental cell signaling. *Genes Dev.* 2002; 16: 1167–1181. <https://doi.org/10.1101/gad.976502> PMID: 12023297
43. Chang J.L., Chang M. V., Barolo S., and Cadigan K.M. Regulation of the feedback antagonist naked cuticle by Wingless signaling. *Dev. Biol.* 2008; 321: 446–454. <https://doi.org/10.1016/j.ydbio.2008.05.551> PMID: 18585374
44. Shlyueva D., Stampfel G. and Stark A. Transcriptional enhancers: from properties to genome-wide predictions. *Nat. Rev.* 2014; 15: 272–286.
45. Arnold C.D., Gerlach D., Stelzer C., Boryn Ł.M., Rath M., and Stark A. Genome-wide quantitative enhancer activity maps identified by STARR-seq. *Science* 2014; 339: 1–4.
46. Yanez-Cuna J., Arnold C., Stampfel G., Boryn L., Gerlach D., Rath M., et al. Dissection of thousands of cell type-specific enhancers identifies dinucleotide repeat motifs as general enhancer features. *Genome Research* 2014; 24: 1147–1156. <https://doi.org/10.1101/gr.169243.113> PMID: 24714811
47. Shlyueva D., Stelzer C., Gerlach D., Yanez-Cuna J.O., Rath M., Boryn L.M., et al. Hormone-Responsive Enhancer-Activity Maps Reveal Predictive Motifs, Indirect Repression, and Targeting of Closed Chromatin. *Mol. Cell* 2014; 54: 180–192. <https://doi.org/10.1016/j.molcel.2014.02.026> PMID: 24685159
48. Naujok O., Lentjes J., Diekmann U., Davenport C., and Lenzen S. Cytotoxicity and activation of the Wnt/beta-catenin pathway in mouse embryonic stem cells treated with four GSK3 inhibitors. *BMC Res.* 2014; Notes 7: 273.
49. Zhang M., Shi J., Huang Y., and Lai L. Expression of canonical WNT/beta-catenin signaling components in the developing human lung. *BMC Dev. Biol.* 2012; 12: 21. <https://doi.org/10.1186/1471-213X-12-21> PMID: 22846383
50. Hoffmans R., Städeli R., and Basler K. Pygopus and legless provide essential transcriptional coactivator functions to Armadillo/beta-catenin. *Curr. Biol.* 2005; 15: 1207–1211. <https://doi.org/10.1016/j.cub.2005.05.054> PMID: 16005293
51. van de Wetering M., Cavallo R., Dooijes D., van Beest M., van Es J., Loureiro J., et al. Armadillo coactivates transcription driven by the product of the Drosophila segment polarity gene dTCF. *Cell* 1997; 88: 789–799. PMID: 9118222
52. Atcha F.A., Syed A., Wu B., Hoverter N.P., Yokoyama N.N., Ting J.-H.T., et al. A unique DNA binding domain converts T-cell factors into strong Wnt effectors. *Mol. Cell. Biol.* 2007; 27: 8352–8363. <https://doi.org/10.1128/MCB.02132-06> PMID: 17893322
53. Archbold H.C., Broussard C., Chang M. V., and Cadigan K.M. Bipartite recognition of DNA by TCF/Pangolin is remarkably flexible and contributes to transcriptional responsiveness and tissue specificity of wingless signaling. *PLoS Genet.* 2014; 10: e1004591. <https://doi.org/10.1371/journal.pgen.1004591> PMID: 25188465
54. Schreiber E., Matthias P., Mueller M.M. and Schaffner W. Rapid detection of octamer binding proteins with 'mini-extracts', prepared from a small number of cells. *Nucl. Acids Res.* 1989; 17;15: 6419. PMID: 2771659
