# Supplementary material for: Probing the canonicity of the Wnt/Wingless signaling pathway
Source: PLoS Genet. 2017 Apr 3;13(4):e1006700. doi: 10.1371/journal.pgen.1006700 (PMC5393890; doi:10.1371/journal.pgen.1006700)
Supplement: S1 Table — (XLSX) [file pgen.1006700.s008.xlsx]

## Sheet: Oligonucleotids
S1 Table: Primer sequences for qRT-PCR, cloning of gRNAs, PCR
approach	name	sequence 5'-3'
qRT-PCR	nkd_fw	GACCTGGACGGGCATCAC
	nkd_rv	TTGCCAATGGACTCGTATATGG
	Toll-7_fw	TCGGACTACTCGACCCTGGataac
	Toll-7_rv	CTCGCTTTAGAGCCCAGTGTTC
	fz3_fw	ACCTGGCAGGTCACACCAAT
	fz3_rv	AGCAGCCGGATTCTATTAGTGG
	actin5c_fw	GCCCATCTACGAGGGTTATGC
	actin5c_rv	AATCGCGACCAGCCAGATC
	tubulin-alpha_fw	GCCAGATGCCGTCTGACAA
	tubulin-alpha_rv	AGTCTCGCTGAAGAAGGTGTTGA
	TBP_fw	CGCGCATCATCCAAAAGC
	TBP_rv	GCCGACCATGTTTTGAATCTTAA
	axo_qPCR_fw	AGGGTCTGGCCTCACATAAC
	axo_qPCR_rv	GGTATGACATTCACTTCGTTC
	pan_Nterm_qPCR_fw	ACGAAGGAGATCGCGAGGATG
	pan_Nterm_qPCR_rv	CTGTGGTCCGGCCTTGAAAT
	noc_qPCR_fw	CCAGTACCTTCAACCGGATT
	noc_qPCR_rv	TGTTCTTGTCCATTGCCA
	Tre1_qPCR_fw	GCTGTTTCACTCCTCAGCAT
	Tre1_qPCR_rv	GCAGAAAGGAGACGGCCCAAA
	Ugt35a_qPCR_fw	CCATCGGGGTCACAATGTCAC
	Ugt35a_qPCR_rv	GTCAACATTTGCCATTGACTC
	Pxn_qPCR_fw	TGAGGTTCGTCTATCTGAACA
	Pxn_qPCR_rv	GCGATTCAGACGCGGCAAGTTGT
	CG6499_qPCR_fw	TGTATGGGTCTGTTTGTCCT
	CG6499_qPCR_rv	TTGATCAGATCCATGATGTCC
	CG4019_qPCR_fw	ATCACCTCCATCCTGGTCAT
	CG4019_qPCR_rv	ATCCAGTTGCTCTCGAAGTGC
	Nplp2_qPCR_fw	AGGCCCAGGGTGATTTCAAC
	Nplp2_qPCR_rv	GGCTGGTGCCTGAAGAAAT
Primer for gRNA (Addgene 49410)	sgRNA-p1_fw	GTCGtttggctacgacgatattt
	sgRNA-p1_rv	AAACaaatatcgtcgtagccaaa
	sgRNA-p2_fw	GTCGgcgttcatgctctatatga
	sgRNA-p2_rv	AAACtcatatagagcatgaacgc
Primer for gRNA (Addgene 49330)	sgRNA-a1_fw	ttcGGCTGGCATGTAACTCATCT
	sgRNA-a1_rv	aacAGATGAGTTACATGCCAGCC
	sgRNA-a2_fw	ttcGATCAACTCGGGTATGGCCC
	sgRNA-a2_rv	aacGGGCCATACCCGAGTTGATC
	sgRNA-p1_fw	TTCGtttggctacgacgatattt
	sgRNA-p1_rv	AACaaatatcgtcgtagccaaaC
	sgRNA-p2_fw	TTCGgcgttcatgctctatatga
	sgRNA-p2_rv	AACtcatatagagcatgaacgcC
PCR primers	sgRNA-a1_PCRfw	GCACACACGAACTCCATGTTAT
	sgRNA-a1_PCRrv	CTGGGTATACAAAAGCCCAAAG
	sgRNA-a2_PCRfw	TCGTTGCAGCAGAGTAACCAT
	sgRNA-a2_PCRrv	TTCACACAAGACCAAGTGGA
	sgRNA-p1_PCRfw	AACACCACCACCAGCGCATTG
	sgRNA-p2_PCRrv	TGATTAATCGCAGCCGATTC
	sgRNA-p2_PCRfw	GTGTATACTTCCGCATGTCTT
	sgRNA-p2_PCRrv	TGATTAATCGCAGCCGATTC
