# Supplementary material for: Probing the canonicity of the Wnt/Wingless signaling pathway
Source: PLoS Genet. 2017 Apr 3;13(4):e1006700. doi: 10.1371/journal.pgen.1006700 (PMC5393890; doi:10.1371/journal.pgen.1006700)
Supplement: S2 Table — (XLSX) [file pgen.1006700.s009.xlsx]

## Sheet: motifs
S2 Table: de novo motif search using DREME
activated enhancers
Motif	E-value	unerased E-value
ATANATA	5e-10	5e-10
GKCGGCR	1.7e-08	1.7e-08
AAAGWRA	0.0018	0.00099
CCACBCCC	0.0046	0.0022
MGATAAGA	0.0046	0.0046
CACMCAC	0.009	0.0049
CTGGCH	0.043	0.043
repressed enhancers
Motif	E-value	unerased E-value
CTTATCD	5.4e-28	5.4e-28
AHATAYAT	1.5e-20	1.5e-20
CACACWC	1.5e-17	1.5e-17
TTTRTTTW	2.9e-13	5.8e-13
CAGCARC	4.6e-11	3.7e-11
CYCTCHC	2.2e-07	1.2e-07
ARCGGAA	1.1e-06	2.1e-07
CCCCCNC	2.4e-06	6.9e-07
RACAACAA	7.9e-06	1.5e-06
ATATRTR	7.8e-05	1.3e-13
AKAAACA	0.0013	9.3e-07
CTCTSC	0.005	5.6e-05
GCWGATA	0.005	2.7e-08
AAAAAAAA	0.009	0.00075
CACTYG	0.012	0.00039
AGCGAGMG	0.021	4.7e-05
BACTTCC	0.026	2.2e-06
